# Supplementary material for: Vpr Enhances HIV-1 Env Processing and Virion Infectivity in Macrophages by Modulating TET2-Dependent IFITM3 Expression
Source: PubMed Central journal article supplement (PMC6703422; doi:10.1128/mbio.01344-19), 2019-08-20

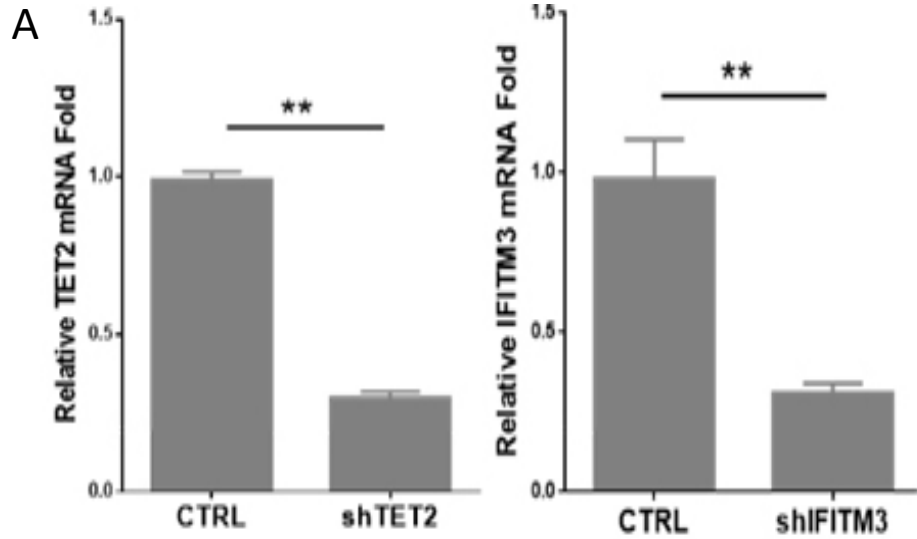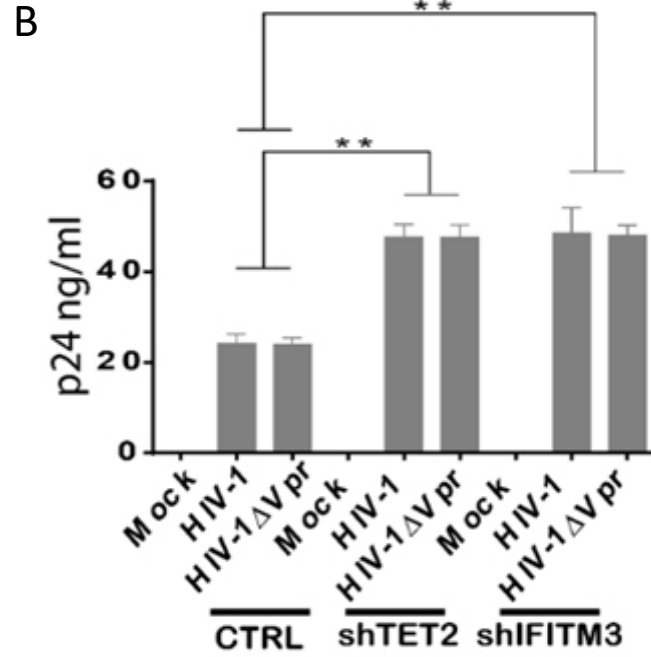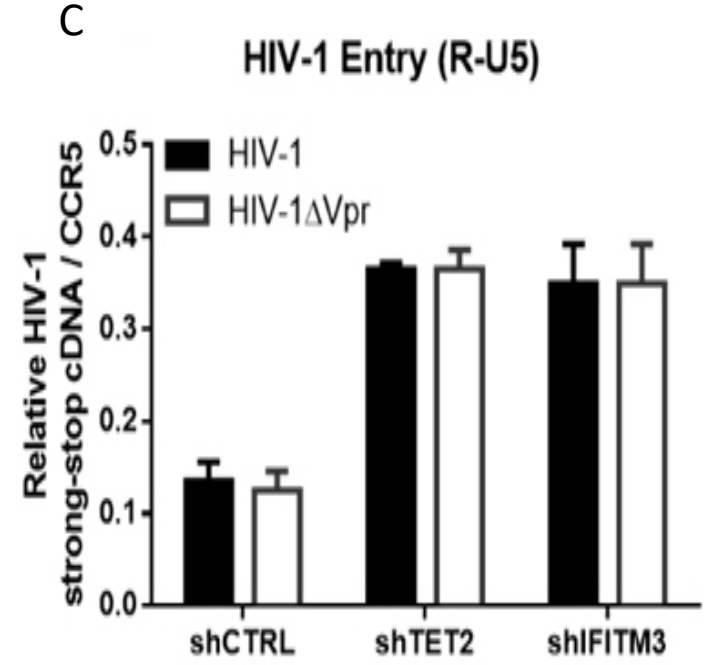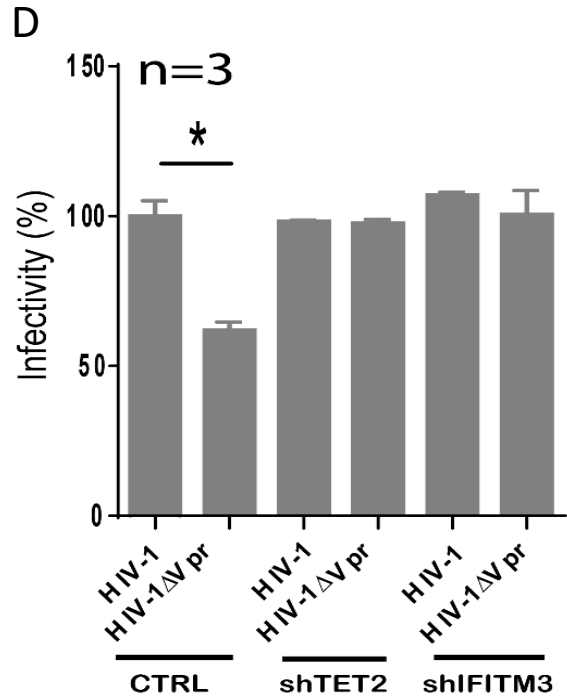

Supplement: mBio.01344-19-sf003.pdf [file mBio.01344-19-sf003.pdf]
